# Supplementary material
Source: MDPI journal article supplement (https://www.mdpi.com/2673-6772/1/4/21)
Supplement: s1 [file s1]

**Table S1.** Description of the 418 samples (spleen, blood or ectoparasites) collected from bats in Campo Grande, Mato Grosso do Sul, Brazil, and used in the present work for molecular screening of Anaplasmatidae agents and *Coxiella burnetii*.

| ID      | Capture site | Bat or ectoparasite species             | Forearm size | Sex | Age      | Reproductive status | Sample type         |
|---------|--------------|-----------------------------------------|--------------|-----|----------|---------------------|---------------------|
| MCG 01  | CEA Polonês  | <i>Artibeus lituratus</i>               | 73,6         | M   | Adult    | Active              | Spleen and Blood    |
| SM 01   |              | <i>Periglischrus iheringi</i>           |              |     |          |                     | Spinturnicidae mite |
| MCG 02  | CEA Polonês  | <i>Artibeus lituratus</i>               | 73,8         | F   | Adult    | Inactive            | Spleen and Blood    |
| BF 02   |              | <i>Paratrachobius longicrus</i>         |              |     |          |                     | Bat fly             |
| SM 02   |              | <i>Periglischrus iheringi</i>           |              |     |          |                     | Spinturnicidae mite |
| MCG 03  | CEA Polonês  | <i>Artibeus planirostris</i>            | 60,7         | F   | Adult    | Inactive            | Spleen and Blood    |
| MCG 04  | CEA Polonês  | <i>Myotis nigricans</i>                 | 37,8         | M   | Adult    | Active              | Spleen              |
| MM 04   |              | <i>Steatonyssus sp.</i>                 |              |     |          |                     | Macronyssidae mite  |
| MCG 05  | CEA Polonês  | <i>Platyrrhinus lineatus</i>            | 49,8         | F   | Adult    | Inactive            | Spleen and Blood    |
| SM 05   |              | <i>Periglischrus iheringi</i>           |              |     |          |                     | Spinturnicidae mite |
| MM 05   |              | <i>Steatonyssus sp.</i>                 |              |     |          |                     | Macronyssidae mite  |
| MCG 06  | CEA Polonês  | <i>Artibeus planirostris</i>            | 67,2         | M   | Adult    | Active              | Spleen and Blood    |
| MCG 07  | CEA Polonês  | <i>Artibeus planirostris</i>            | 59,6         | F   | Juvenile | Inactive            | Spleen and Blood    |
| BF 07.1 |              | <i>Megistopoda aranea</i>               |              |     |          |                     | Bat fly             |
| BF 07.2 |              | <i>Megistopoda aranea</i>               |              |     |          |                     | Bat fly             |
| MCG 08  | CEA Polonês  | <i>Artibeus lituratus</i>               | 73,7         | M   | Adult    | Active              | Spleen and Blood    |
| BF 08   |              | <i>Megistopoda aranea</i>               |              |     |          |                     | Bat fly             |
| SM 08   |              | <i>Periglischrus iheringi</i>           |              |     |          |                     | Spinturnicidae mite |
| MCG 09  | CEA Polonês  | <i>Glossophaga soricina</i>             | 36,7         | M   | Adult    | Active              | Spleen and Blood    |
| BF 09   |              | <i>Trichobius parasiticus (complex)</i> |              |     |          |                     | Bat fly             |
| MCG 10  | CEA Polonês  | <i>Artibeus lituratus</i>               | 73,4         | M   | Adult    | Active              | Spleen and Blood    |
| BF 10   |              | <i>Megistopoda aranea</i>               |              |     |          |                     | Bat fly             |
| MCG 11  | CEA Polonês  | <i>Artibeus planirostris</i>            | 57,8         | M   | Adult    | Active              | Spleen and Blood    |
| BF 11   |              | <i>Megistopoda aranea</i>               |              |     |          |                     | Bat fly             |
| SM 11   |              | <i>Periglischrus iheringi</i>           |              |     |          |                     | Spinturnicidae mite |
| MCG 12  | CEA Polonês  | <i>Artibeus planirostris</i>            | 62,4         | F   | Juvenile | Inactive            | Spleen and Blood    |
| BF 12   |              | <i>Megistopoda aranea</i>               |              |     |          |                     | Bat fly             |
| MCG 13  | CEA Polonês  | <i>Artibeus planirostris</i>            | 63           | M   | Juvenile | Inactive            | Spleen and Blood    |
| MCG 14  | CEA Polonês  | <i>Artibeus planirostris</i>            | 65,6         | M   | Juvenile | Inactive            | Spleen and Blood    |
| SM 14   |              | <i>Periglischrus iheringi</i>           |              |     |          |                     | Spinturnicidae mite |
| MCG 15  | CEA Polonês  | <i>Platyrrhinus lineatus</i>            | 50           | F   | Juvenile | Inactive            | Spleen and Blood    |
| MCG 16  | CEA Polonês  | <i>Artibeus planirostris</i>            | 64,1         | F   | Juvenile | Inactive            | Spleen and Blood    |
| BF 16   |              | <i>Megistopoda aranea</i>               |              |     |          |                     | Bat fly             |
| MCG 17  | CEA Polonês  | <i>Artibeus planirostris</i>            | 62,3         | F   | Adult    | Pos-lactating       | Spleen and Blood    |
| BF 17   |              | <i>Megistopoda aranea</i>               |              |     |          |                     | Bat fly             |
| MCG 18  | CEA Polonês  | <i>Platyrrhinus lineatus</i>            | 49,1         | F   | Juvenile | Inactive            | Spleen and Blood    |
| SM 18   |              | <i>Periglischrus iheringi</i>           |              |     |          |                     | Spinturnicidae mite |
| MCG 19  | CEA Polonês  | <i>Artibeus planirostris</i>            | 61,6         | F   | Juvenile | Inactive            | Spleen and Blood    |
| BF 19.1 |              | <i>Megistopoda aranea</i>               |              |     |          |                     | Bat fly             |
| BF 19.2 |              | <i>Megistopoda aranea</i>               |              |     |          |                     | Bat fly             |
| MCG 20  | CEA Polonês  | <i>Platyrrhinus lineatus</i>            | 48,9         | M   | Juvenile | Inactive            | Spleen and Blood    |
| BF 20   |              | <i>Trichobius dugesii (complex)</i>     |              |     |          |                     | Bat fly             |
| MCG 21  | CEA Polonês  | <i>Platyrrhinus lineatus</i>            | 49,9         | F   | Juvenile | Inactive            | Spleen and Blood    |
| SM 21   |              | <i>Periglischrus iheringi</i>           |              |     |          |                     | Spinturnicidae mite |

|         |                 |                                         |      |   |          |          |                     |
|---------|-----------------|-----------------------------------------|------|---|----------|----------|---------------------|
| MCG 22  | CEA Polonês     | <i>Platyrrhinus lineatus</i>            | 47,4 | M | Juvenile | Inactive | Spleen and Blood    |
| MCG 23  | CEA Polonês     | <i>Eptesicus furinalis</i>              | 39,9 | F | Juvenile | Inactive | Spleen and Blood    |
| BF 23   |                 | <i>Trichobius dugesii (complex)</i>     |      |   |          |          | Bat fly             |
| MM 23   |                 | <i>Steatonyssus sp.</i>                 |      |   |          |          | Macronyssidae mite  |
| MCG 24  | CEA Polonês     | <i>Platyrrhinus lineatus</i>            | 48,7 | F | Juvenile | Inactive | Spleen and Blood    |
| MCG 25  | CEA Polonês     | <i>Platyrrhinus lineatus</i>            | 50,9 | F | Juvenile | Inactive | Spleen and Blood    |
| BF 25   |                 | <i>Trichobius dugesii (complex)</i>     |      |   |          |          | Bat fly             |
| SM 25   |                 | <i>Periglischrus iheringi</i>           |      |   |          |          | Spinturnicidae mite |
| MCG 26  | CEA Polonês     | <i>Artibeus planirostris</i>            | 64,3 | F | Juvenile | Inactive | Spleen and Blood    |
| SM 26   |                 | <i>Periglischrus iheringi</i>           |      |   |          |          | Spinturnicidae mite |
| MCG 27  | CEA Polonês     | <i>Artibeus planirostris</i>            | 60,7 | F | Juvenile | Inactive | Spleen and Blood    |
| BF 27   |                 | <i>Megistopoda aranea</i>               |      |   |          |          | Bat fly             |
| SM 27   |                 | <i>Periglischrus iheringi</i>           |      |   |          |          | Spinturnicidae mite |
| MCG 28  | CEA Polonês     | <i>Artibeus lituratus</i>               | 69,5 | F | Adult    | Inactive | Spleen and Blood    |
| SM 28   |                 | <i>Periglischrus iheringi</i>           |      |   |          |          | Spinturnicidae mite |
| MCG 29  | CEA Polonês     | <i>Artibeus planirostris</i>            | 63,4 | M | Juvenile | Inactive | Spleen and Blood    |
| MCG 30  | CEA Polonês     | <i>Platyrrhinus lineatus</i>            | 50,7 | F | Juvenile | Inactive | Spleen and Blood    |
| BF 30   |                 | <i>Trichobius dugesii (complex)</i>     |      |   |          |          | Bat fly             |
| MCG 31  | CEA Polonês     | <i>Artibeus lituratus</i>               | 78,4 | M | Adult    | Inactive | Spleen and Blood    |
| MCG 32  | CEA Polonês     | <i>Platyrrhinus lineatus</i>            | 50,3 | F | Juvenile | Inactive | Spleen and Blood    |
| SM 32   |                 | <i>Periglischrus iheringi</i>           |      |   |          |          | Spinturnicidae mite |
| MCG 33  | CEA Polonês     | <i>Artibeus planirostris</i>            | 64,9 | F | Juvenile | Inactive | Spleen and Blood    |
| SM 33   |                 | <i>Periglischrus iheringi</i>           |      |   |          |          | Spinturnicidae mite |
| MCG 34  | CEA Polonês     | <i>Platyrrhinus lineatus</i>            | 50,4 | F | Juvenile | Inactive | Spleen and Blood    |
| BF 34   |                 | <i>Trichobius parasiticus (complex)</i> |      |   |          |          | Bat fly             |
| SM 34   |                 | <i>Periglischrus iheringi</i>           |      |   |          |          | Spinturnicidae mite |
| MCG 35  | CEA Polonês     | <i>Artibeus planirostris</i>            | 62,4 | F | Adult    | Inactive | Spleen and Blood    |
| SM 35   |                 | <i>Periglischrus iheringi</i>           |      |   |          |          | Spinturnicidae mite |
| MCG 36  | CEA Florestinha | <i>Artibeus planirostris</i>            | 63,7 | F | Adult    | Inactive | Spleen and Blood    |
| MCG 37  | CEA Florestinha | <i>Carollia perspicillata</i>           | 45,4 | M | Adult    | Active   | Spleen and Blood    |
| BF 37   |                 | <i>Trichobius joblingi</i>              |      |   |          |          | Bat fly             |
| MCG 38  | CEA Florestinha | <i>Artibeus planirostris</i>            | 61,9 | F | Juvenile | Inactive | Spleen and Blood    |
| BF 38   |                 | <i>Megistopoda aranea</i>               |      |   |          |          | Bat fly             |
| MCG 39  | CEA Florestinha | <i>Artibeus planirostris</i>            | 62,8 | F | Juvenile | Inactive | Spleen and Blood    |
| BF 39   |                 | <i>Megistopoda aranea</i>               |      |   |          |          | Bat fly             |
| MCG 40  | CEA Florestinha | <i>Artibeus planirostris</i>            | 63,4 | F | Adult    | Inactive | Spleen and Blood    |
| BF 40   |                 | <i>Megistopoda aranea</i>               |      |   |          |          | Bat fly             |
| MCG 41  | CEA Florestinha | <i>Platyrrhinus lineatus</i>            | 51,4 | M | Juvenile | Inactive | Spleen and Blood    |
| SM 41   |                 | <i>Periglischrus iheringi</i>           |      |   |          |          | Spinturnicidae mite |
| MCG 42  | CEA Florestinha | <i>Carollia perspicillata</i>           | 44,3 | M | Juvenile | Inactive | Spleen and Blood    |
| BF 42.1 |                 | <i>Trichobius dugesii (complex)</i>     |      |   |          |          | Bat fly             |
| BF 42.2 |                 | <i>Trichobius dugesii (complex)</i>     |      |   |          |          | Bat fly             |
| MCG 43  | CEA Florestinha | <i>Artibeus planirostris</i>            | 62   | M | Juvenile | Inactive | Spleen and Blood    |
| BF 43.1 |                 | <i>Megistopoda aranea</i>               |      |   |          |          | Bat fly             |
| BF 43.2 |                 | <i>Megistopoda aranea</i>               |      |   |          |          | Bat fly             |
| MCG 44  | CEA Polonês     | <i>Artibeus planirostris</i>            | 66,3 | M | Adult    | Active   | Spleen and Blood    |
| BF 44   |                 | <i>Megistopoda aranea</i>               |      |   |          |          | Bat fly             |

|         |                 |                                   |      |   |          |          |                     |
|---------|-----------------|-----------------------------------|------|---|----------|----------|---------------------|
| MCG 45  | CEA Polonês     | <i>Myotis nigricans</i>           | 38,5 | F | Juvenile | Inactive | Spleen and Blood    |
| MCG 46  | CEA Polonês     | <i>Artibeus lituratus</i>         | 72,4 | M | Adult    | Active   | Spleen and Blood    |
| MCG 47  | CEA Polonês     | <i>Platyrrhinus lineatus</i>      | 46,4 | M | Adult    | Active   | Spleen and Blood    |
| MCG 48  | CEA Polonês     | <i>Artibeus planirostris</i>      | 60,5 | M | Juvenile | Inactive | Spleen and Blood    |
| MCG 49  | CEA Polonês     | <i>Artibeus lituratus</i>         | 73,4 | M | Adult    | Active   | Spleen and Blood    |
| MCG 50  | CEA Polonês     | <i>Artibeus lituratus</i>         | 76,1 | M | Adult    | Active   | Spleen and Blood    |
| MCG 51  | CEA Polonês     | <i>Artibeus planirostris</i>      | 64,1 | M | Adult    | Active   | Spleen and Blood    |
| MCG 52  | CEA Polonês     | <i>Molossus molossus</i>          | 36,4 | F | Juvenile | Inactive | Spleen and Blood    |
| MCG 53  | CEA Polonês     | <i>Artibeus lituratus</i>         | 73,1 | M | Adult    | Active   | Spleen and Blood    |
| MCG 54  | CEA Florestinha | <i>Molossus molossus</i>          | 40,4 | M | Juvenile | Inactive | Spleen and Blood    |
| MCG 55  | CEA Florestinha | <i>Phyllostomus discolor</i>      | 63,6 | M | Adult    | Active   | Spleen and Blood    |
| BF 55   |                 | <i>Trichobius costalimai</i>      |      |   |          |          | Bat fly             |
| MCG 56  | CEA Florestinha | <i>Phyllostomus discolor</i>      | 63,7 | M | Adult    | Active   | Spleen and Blood    |
| BF56.1  |                 | <i>Strebla hertigi</i>            |      |   |          |          | Bat fly             |
| BF 56.2 |                 | <i>Trichobius costalimai</i>      |      |   |          |          | Bat fly             |
| BF 56.3 |                 | <i>Trichobius costalimai</i>      |      |   |          |          | Bat fly             |
| BF 53.4 |                 | <i>Trichobius costalimai</i>      |      |   |          |          | Bat fly             |
| BF 56.5 |                 | <i>Trichobius costalimai</i>      |      |   |          |          | Bat fly             |
| SM 56.1 |                 | <i>Periglischrus torrealbai</i>   |      |   |          |          | Spinturnicidae mite |
| SM 56.2 |                 | <i>Periglischrus acutisternus</i> |      |   |          |          | Spinturnicidae mite |
| MM 56   |                 | <i>Steatonyssus sp.</i>           |      |   |          |          | Macronyssidae mite  |
| TL 56.1 |                 | <i>Ornithodoros hasei</i>         |      |   |          |          | Tick larvae         |
| TL 56.2 |                 | <i>Ornithodoros hasei</i>         |      |   |          |          | Tick larvae         |
| TL 56.3 |                 | <i>Ornithodoros hasei</i>         |      |   |          |          | Tick larvae         |
| TL 56.4 |                 | <i>Ornithodoros hasei</i>         |      |   |          |          | Tick larvae         |
| TL 56.5 |                 | <i>Ornithodoros hasei</i>         |      |   |          |          | Tick larvae         |
| TL 56.6 |                 | <i>Ornithodoros hasei</i>         |      |   |          |          | Tick larvae         |
| MCG 57  | CEA Florestinha | <i>Phyllostomus discolor</i>      | 60,8 | M | Adult    | Active   | Spleen and Blood    |
| BF 57.1 |                 | <i>Trichobius costalimai</i>      |      |   |          |          | Bat fly             |
| BF 57.2 |                 | <i>Trichobius costalimai</i>      |      |   |          |          | Bat fly             |
| BF 57.3 |                 | <i>Trichobius costalimai</i>      |      |   |          |          | Bat fly             |
| BF 57.4 |                 | <i>Trichobius costalimai</i>      |      |   |          |          | Bat fly             |
| BF 57.5 |                 | <i>Trichobius costalimai</i>      |      |   |          |          | Bat fly             |
| SM 57   |                 | <i>Periglischrus torrealbai</i>   |      |   |          |          | Spinturnicidae mite |
| TL 57.1 |                 | <i>Ornithodoros hasei</i>         |      |   |          |          | Tick larvae         |
| TL 57.2 |                 | <i>Ornithodoros hasei</i>         |      |   |          |          | Tick larvae         |
| MCG 58  | CEA Florestinha | <i>Artibeus lituratus</i>         | 74,6 | M | Adult    | Active   | Spleen and Blood    |
| SM 58   |                 | <i>Periglischrus iheringi</i>     |      |   |          |          | Spinturnicidae mite |
| MCG 59  | CEA Florestinha | <i>Phyllostomus discolor</i>      | 61,2 | M | Adult    | Inactive | Spleen and Blood    |
| BF 59   |                 | <i>Trichobius costalimai</i>      |      |   |          |          | Bat fly             |
| SM 59   |                 | <i>Periglischrus sp.</i>          |      |   |          |          | Spinturnicidae mite |
| MCG 60  | CEA Florestinha | <i>Molossops temminckii</i>       | 30   | M | Adult    | Active   | Spleen and Blood    |
| MCG 61  | CEA Florestinha | <i>Phyllostomus discolor</i>      | 68,7 | M | Adult    | Active   | Spleen and Blood    |
| SM 61   |                 | <i>Periglischrus torrealbai</i>   |      |   |          |          | Spinturnicidae mite |
| TL 61   |                 | <i>Ornithodoros hasei</i>         |      |   |          |          | Tick larvae         |
| MCG 62  | CEA Florestinha | <i>Phyllostomus discolor</i>      | 62,3 | M | Adult    | Active   | Spleen and Blood    |
| BF 62   |                 | <i>Trichobius costalimai</i>      |      |   |          |          | Bat fly             |
| SM 62.1 |                 | <i>Periglischrus sp.</i>          |      |   |          |          | Spinturnicidae mite |

|         |                 |                                   |      |   |          |          |                     |
|---------|-----------------|-----------------------------------|------|---|----------|----------|---------------------|
| SM 62.2 |                 | <i>Periglischrus sp.</i>          |      |   |          |          | Spinturnicidae mite |
| TL 62.1 |                 | <i>Ornithodoros hasei</i>         |      |   |          |          | Tick larvae         |
| TL 62.2 |                 | <i>Ornithodoros hasei</i>         |      |   |          |          | Tick larvae         |
| MCG 63  | CEA Florestinha | <i>Phyllostomus discolor</i>      | 64,7 | M | Adult    | Active   | Spleen and Blood    |
| BF 63.1 |                 | <i>Trichobius costalimai</i>      |      |   |          |          | Bat fly             |
| BF 63.2 |                 | <i>Trichobius costalimai</i>      |      |   |          |          | Bat fly             |
| MM 63   |                 | <i>Steatonyssus sp.</i>           |      |   |          |          | Macronyssidae mite  |
| TL 63.1 |                 | <i>Ornithodoros hasei</i>         |      |   |          |          | Tick larvae         |
| TL 63.2 |                 | <i>Ornithodoros hasei</i>         |      |   |          |          | Tick larvae         |
| TL 63.3 |                 | <i>Ornithodoros hasei</i>         |      |   |          |          | Tick larvae         |
| TL 63.4 |                 | <i>Ornithodoros hasei</i>         |      |   |          |          | Tick larvae         |
| TL 63.5 |                 | <i>Ornithodoros hasei</i>         |      |   |          |          | Tick larvae         |
| TL 63.6 |                 | <i>Ornithodoros hasei</i>         |      |   |          |          | Tick larvae         |
| TL 63.7 |                 | <i>Ornithodoros hasei</i>         |      |   |          |          | Tick larvae         |
| MCG 64  | CEA Florestinha | <i>Phyllostomus discolor</i>      | 63,7 | M | Adult    | Active   | Spleen and Blood    |
| BF 64.1 |                 | <i>Trichobius costalimai</i>      |      |   |          |          | Bat fly             |
| BF 64.2 |                 | <i>Trichobius costalimai</i>      |      |   |          |          | Bat fly             |
| BF 64.3 |                 | <i>Trichobius costalimai</i>      |      |   |          |          | Bat fly             |
| MM 64   |                 | <i>Steatonyssus sp.</i>           |      |   |          |          | Macronyssidae mite  |
| MCG 65  | CEA Florestinha | <i>Phyllostomus discolor</i>      | 60,4 | M | Adult    | Active   | Spleen and Blood    |
| BF 65.1 |                 | <i>Trichobius costalimai</i>      |      |   |          |          | Bat fly             |
| BF 65.2 |                 | <i>Trichobius costalimai</i>      |      |   |          |          | Bat fly             |
| BF 65.3 |                 | <i>Trichobius costalimai</i>      |      |   |          |          | Bat fly             |
| BF 65.4 |                 | <i>Trichobius costalimai</i>      |      |   |          |          | Bat fly             |
| SM 65   |                 | <i>Periglischrus acutisternus</i> |      |   |          |          | Spinturnicidae mite |
| MCG 66  | CEA Florestinha | <i>Phyllostomus discolor</i>      | 63,2 | M | Adult    | Active   | Spleen and Blood    |
| BF 66.1 |                 | <i>Trichobius costalimai</i>      |      |   |          |          | Bat fly             |
| BF 66.2 |                 | <i>Trichobius costalimai</i>      |      |   |          |          | Bat fly             |
| SM 66   |                 | <i>Periglischrus acutisternus</i> |      |   |          |          | Spinturnicidae mite |
| MCG 67  | CEA Florestinha | <i>Phyllostomus discolor</i>      | 63,5 | M | Adult    | Active   | Spleen and Blood    |
| SM 67   |                 | <i>Periglischrus torrealbai</i>   |      |   |          |          | Spinturnicidae mite |
| MCG 68  | CEA Florestinha | <i>Phyllostomus discolor</i>      | 62,8 | M | Adult    | Active   | Spleen and Blood    |
| BF 68.1 |                 | <i>Trichobius costalimai</i>      |      |   |          |          | Bat fly             |
| BF 68.2 |                 | <i>Trichobius costalimai</i>      |      |   |          |          | Bat fly             |
| BF 68.3 |                 | <i>Trichobius costalimai</i>      |      |   |          |          | Bat fly             |
| SM 68   |                 | <i>Periglischrus torrealbai</i>   |      |   |          |          | Spinturnicidae mite |
| MCG 69  | CEA Florestinha | <i>Carollia perspicillata</i>     | 45   | F | Juvenile | Inactive | Spleen and Blood    |
| BF 69   |                 | <i>Trichobius joblingi</i>        |      |   |          |          | Bat fly             |
| MCG 70  | CEA Florestinha | <i>Phyllostomus discolor</i>      | 64,3 | M | Adult    | Active   | Spleen and Blood    |
| BF 70.1 |                 | <i>Strebla hertigi</i>            |      |   |          |          | Bat fly             |
| BF 70.2 |                 | <i>Strebla hertigi</i>            |      |   |          |          | Bat fly             |
| SM 70.1 |                 | <i>Periglischrus sp.</i>          |      |   |          |          | Spinturnicidae mite |
| SM 70.1 |                 | <i>Periglischrus sp.</i>          |      |   |          |          | Spinturnicidae mite |
| SM 70.2 |                 | <i>Periglischrus sp.</i>          |      |   |          |          | Spinturnicidae mite |
| MCG 71  | CEA Florestinha | <i>Phyllostomus discolor</i>      | 59,3 | M | Juvenile | Inactive | Spleen and Blood    |
| SM 71   |                 | <i>Periglischrus sp.</i>          |      |   |          |          | Spinturnicidae mite |
| MM 71   |                 | <i>Steatonyssus sp.</i>           |      |   |          |          | Macronyssidae mite  |
| MCG 72  | CEA Florestinha | <i>Phyllostomus discolor</i>      | 64,7 | M | Juvenile | Inactive | Spleen and Blood    |

|         |                 |                                     |      |   |          |               |                     |
|---------|-----------------|-------------------------------------|------|---|----------|---------------|---------------------|
| BF 72.1 |                 | <i>Trichobius costalimai</i>        |      |   |          |               | Bat fly             |
| BF 72.2 |                 | <i>Trichobius costalimai</i>        |      |   |          |               | Bat fly             |
| SM 72   |                 | <i>Periglischrus acutisternus</i>   |      |   |          |               | Spinturnicidae mite |
| TL 72   |                 | <i>Ornithodoros hasei</i>           |      |   |          |               | Tick larvae         |
| MCG 73  | CEA Florestinha | <i>Molossus molossus</i>            | 41,8 | M | Adult    | Active        | Spleen and Blood    |
| MCG 74  | CEA Polonês     | <i>Eptesicus furinalis</i>          | 36,8 | M | Juvenile | Inactive      | Spleen and Blood    |
| MM 74   |                 | <i>Steatonyssus sp.</i>             |      |   |          |               | Macronyssidae mite  |
| MCG 75  | CEA Polonês     | <i>Eptesicus furinalis</i>          | 39,7 | F | Juvenile | Inactive      | Spleen and Blood    |
| MM 75   |                 | <i>Steatonyssus sp.</i>             |      |   |          |               | Macronyssidae mite  |
| MCG 76  | CEA Polonês     | <i>Artibeus lituratus</i>           | 73   | M | Adult    | Active        | Spleen and Blood    |
| MCG 77  | CEA Polonês     | <i>Platyrrhinus lineatus</i>        | 47   | M | Juvenile | Inactive      | Spleen and Blood    |
| MCG 78  | CEA Polonês     | <i>Artibeus lituratus</i>           | 77,8 | M | Adult    | Active        | Spleen and Blood    |
| SM 78   |                 | <i>Periglischrus iheringi</i>       |      |   |          |               | Spinturnicidae mite |
| MCG 79  | CEA Polonês     | <i>Platyrrhinus lineatus</i>        | 50,2 | F | Juvenile | Inactive      | Spleen and Blood    |
| BF 79   |                 | <i>Trichobius dugesii (complex)</i> |      |   |          |               | Bat fly             |
| MCG 80  | CEA Polonês     | <i>Platyrrhinus lineatus</i>        | 46,8 | F | Juvenile | Inactive      | Spleen and Blood    |
| MCG 81  | CEA Polonês     | <i>Platyrrhinus lineatus</i>        | 46,9 | F | Juvenile | Inactive      | Spleen and Blood    |
| MCG 82  | CEA Polonês     | <i>Eptesicus furinalis</i>          | 36,5 | M | Juvenile | Inactive      | Spleen and Blood    |
| MM 82   |                 | <i>Steatonyssus sp.</i>             |      |   |          |               | Macronyssidae mite  |
| MCG 83  | CEA Polonês     | <i>Platyrrhinus lineatus</i>        | 49,8 | F | Juvenile | Inactive      | Spleen and Blood    |
| BF 83   |                 | <i>Trichobius dugesii (complex)</i> |      |   |          |               | Bat fly             |
| SM 83   |                 | <i>Periglischrus iheringi</i>       |      |   |          |               | Spinturnicidae mite |
| MCG 84  | CEA Polonês     | <i>Artibeus lituratus</i>           | 66,9 | F | Juvenile | Inactive      | Spleen and Blood    |
| SM 84   |                 | <i>Periglischrus iheringi</i>       |      |   |          |               | Spinturnicidae mite |
| MCG 85  | CEA Polonês     | <i>Artibeus lituratus</i>           | 71   | F | Adult    | Pos-lactating | Spleen and Blood    |
| MCG 86  | CEA Polonês     | <i>Platyrrhinus lineatus</i>        | 49,1 | M | Adult    | Inactive      | Spleen and Blood    |
| MCG 87  | CEA Polonês     | <i>Artibeus lituratus</i>           | 73   | M | Juvenile | Inactive      | Spleen and Blood    |
| SM 87   |                 | <i>Periglischrus iheringi</i>       |      |   |          |               | Spinturnicidae mite |
| MCG 88  | CEA Polonês     | <i>Platyrrhinus lineatus</i>        | 46,8 | F | Juvenile | Inactive      | Spleen and Blood    |
| MCG 89  | CEA Polonês     | <i>Platyrrhinus lineatus</i>        | 46,2 | M | Juvenile | Inactive      | Spleen and Blood    |
| BF 89   |                 | <i>Trichobius dugesii (complex)</i> |      |   |          |               | Bat fly             |
| MCG 90  | CEA Polonês     | <i>Artibeus lituratus</i>           | 69,3 | M | Juvenile | Inactive      | Spleen and Blood    |
| SM 90   |                 | <i>Periglischrus iheringi</i>       |      |   |          |               | Spinturnicidae mite |
| MM 90   |                 | <i>Steatonyssus sp.</i>             |      |   |          |               | Macronyssidae mite  |
| MCG 91  | CEA Florestinha | <i>Eumops perotis</i>               | 80,3 | F | Adult    | Pos-lactating | Spleen and Blood    |
| MM 91   |                 | <i>Steatonyssus sp.</i>             |      |   |          |               | Macronyssidae mite  |
| MCG 92  | CEA Florestinha | <i>Eumops perotis</i>               | 82,5 | F | Adult    | Pos-lactating | Spleen and Blood    |
| MM 92   |                 | <i>Steatonyssus sp.</i>             |      |   |          |               | Macronyssidae mite  |
| MCG 93  | CEA Florestinha | <i>Eumops perotis</i>               | 82,9 | M | Adult    | Inactive      | Spleen and Blood    |
| MM 93   |                 | <i>Steatonyssus sp.</i>             |      |   |          |               | Macronyssidae mite  |
| MCG 94  | CEA Florestinha | <i>Molossus molossus</i>            | 40   | M | Juvenile | Inactive      | Spleen and Blood    |
| MM 94   |                 | <i>Steatonyssus sp.</i>             |      |   |          |               | Macronyssidae mite  |
| MCG 95  | CEA Florestinha | <i>Eumops perotis</i>               | 81,9 | M | Adult    | Active        | Spleen and Blood    |
| MM 95   |                 | <i>Steatonyssus sp.</i>             |      |   |          |               | Macronyssidae mite  |
| MCG 96  | CEA Polonês     | <i>Artibeus lituratus</i>           | 73,7 | M | Adult    | Active        | Spleen and Blood    |
| MCG 97  | CEA Polonês     | <i>Artibeus lituratus</i>           | 77,5 | M | Adult    | Active        | Spleen              |
| SM 97   |                 | <i>Periglischrus iheringi</i>       |      |   |          |               | Spinturnicidae mite |
| MCG 98  | CEA Polonês     | <i>Artibeus lituratus</i>           | 72,9 | M | Adult    | Active        | Spleen and Blood    |

|         |                 |                                     |      |   |          |               |                     |
|---------|-----------------|-------------------------------------|------|---|----------|---------------|---------------------|
| MCG 99  | CEA Polonês     | <i>Chiroderma villosus</i>          | 52,2 | F | Adult    | Pos-lactating | Spleen and Blood    |
| MCG 100 | CEA Polonês     | <i>Artibeus lituratus</i>           | 72,5 | M | Adult    | Active        | Spleen and Blood    |
| MCG 101 | CEA Polonês     | <i>Platyrrhinus lineatus</i>        | 48,1 | M | Juvenile | Inactive      | Spleen and Blood    |
| MCG 102 | CEA Polonês     | <i>Artibeus lituratus</i>           | 72,8 | M | Juvenile | Inactive      | Spleen and Blood    |
| SM 102  |                 | <i>Periglischrus iheringi</i>       |      |   |          |               | Spinturnicidae mite |
| MCG 103 | CEA Polonês     | <i>Artibeus planirostris</i>        | 58,1 | M | Juvenile | Inactive      | Spleen and Blood    |
| MCG 104 | CEA Polonês     | <i>Artibeus lituratus</i>           | 71,1 | M | Juvenile | Inactive      | Spleen and Blood    |
| SM 104  |                 | <i>Periglischrus iheringi</i>       |      |   |          |               | Spinturnicidae mite |
| MCG 105 | CEA Polonês     | <i>Artibeus lituratus</i>           | 70   | M | Adult    | Active        | Spleen and Blood    |
| MCG 106 | CEA Polonês     | <i>Eptesicus furinalis</i>          | 38,4 | F | Juvenile | Inactive      | Spleen and Blood    |
| MM 106  |                 | <i>Steatonyssus sp.</i>             |      |   |          |               | Macronyssidae mite  |
| MCG 107 | CEA Polonês     | <i>Artibeus planirostris</i>        | 65   | F | Adult    | Pos-lactating | Spleen and Blood    |
| MCG 108 | CEA Polonês     | <i>Artibeus planirostris</i>        | 66,5 | F | Adult    | Inactive      | Spleen and Blood    |
| MCG 109 | CEA Polonês     | <i>Artibeus planirostris</i>        | 61,7 | F | Juvenile | Inactive      | Spleen and Blood    |
| MCG 110 | CEA Polonês     | <i>Artibeus planirostris</i>        | 64,6 | F | Juvenile | Inactive      | Spleen and Blood    |
| MCG 111 | CEA Polonês     | <i>Carollia perspicillata</i>       | 44,5 | F | Juvenile | Inactive      | Spleen and Blood    |
| MCG 112 | CEA Polonês     | <i>Artibeus planirostris</i>        | 66   | M | Juvenile | Inactive      | Spleen and Blood    |
| MCG 113 | CEA Polonês     | <i>Artibeus planirostris</i>        | 66,1 | F | Juvenile | Inactive      | Spleen and Blood    |
| MCG 114 | CEA Polonês     | <i>Platyrrhinus lineatus</i>        | 48   | F | Juvenile | Inactive      | Spleen and Blood    |
| MCG 115 | CEA Florestinha | <i>Artibeus planirostris</i>        | 64,7 | F | Adult    | Pos-lactating | Spleen and Blood    |
| MCG 116 | CEA Florestinha | <i>Artibeus lituratus</i>           | 77,3 | F | Adult    | Pos-lactating | Spleen and Blood    |
| MCG 117 | CEA Florestinha | <i>Artibeus lituratus</i>           | 70,9 | M | Adult    | Active        | Spleen and Blood    |
| MCG 118 | CEA Florestinha | <i>Artibeus lituratus</i>           | 72,6 | M | Adult    | Active        | Spleen and Blood    |
| MCG 119 | CEA Florestinha | <i>Artibeus lituratus</i>           | 77,7 | M | Adult    | Active        | Spleen and Blood    |
| MCG 120 | CEA Florestinha | <i>Artibeus planirostris</i>        | 64,9 | F | Adult    | Pos-lactating | Spleen and Blood    |
| BF 120  |                 | <i>Megistopoda aranea</i>           |      |   |          |               | Bat fly             |
| MCG 121 | CEA Florestinha | <i>Artibeus lituratus</i>           | 78,1 | F | Adult    | Pos-lactating | Spleen and Blood    |
| MCG 122 | CEA Polonês     | <i>Artibeus planirostris</i>        | 60,7 | M | Juvenile | Inactive      | Spleen and Blood    |
| MM 122  |                 | <i>Steatonyssus sp.</i>             |      |   |          |               | Macronyssidae mite  |
| MCG 123 | CEA Polonês     | <i>Eptesicus furinalis</i>          | 36,8 | M | Juvenile | Inactive      | Spleen and Blood    |
| MM 123  |                 | <i>Steatonyssus sp.</i>             |      |   |          |               | Macronyssidae mite  |
| MCG 124 | CEA Polonês     | <i>Eptesicus furinalis</i>          | 39   | F | Juvenile | Inactive      | Spleen and Blood    |
| SM 124  |                 | <i>Periglischrus sp.</i>            |      |   |          |               | Spinturnicidae mite |
| MCG 125 | CEA Polonês     | <i>Artibeus lituratus</i>           | 73,3 | M | Adult    | Inactive      | Spleen and Blood    |
| MCG 126 | CEA Polonês     | <i>Artibeus lituratus</i>           | 77,5 | F | Adult    | Pos-lactating | Spleen and Blood    |
| BF 126  |                 | <i>Trichobius dugesii (complex)</i> |      |   |          |               | Bat fly             |
| MCG 127 | CEA Polonês     | <i>Carollia perspicillata</i>       | 45,8 | M | Juvenile | Inactive      | Spleen and Blood    |
| MCG 128 | CEA Florestinha | <i>Artibeus lituratus</i>           | 74,9 | F | Adult    | Inactive      | Spleen and Blood    |
| SM 128  |                 | <i>Periglischrus iheringi</i>       |      |   |          |               | Spinturnicidae mite |
| MCG 129 | CEA Florestinha | <i>Artibeus lituratus</i>           | 73,5 | M | Adult    | Active        | Spleen and Blood    |
| MCG 130 | CEA Florestinha | <i>Artibeus lituratus</i>           | 67,2 | M | Adult    | Active        | Spleen and Blood    |
| MCG 131 | CEA Polonês     | <i>Eptesicus furinalis</i>          | 36,3 | F | Juvenile | Inactive      | Spleen and Blood    |
| MM 131  |                 | <i>Steatonyssus sp.</i>             |      |   |          |               | Macronyssidae mite  |
| MCG 132 | CEA Polonês     | <i>Eptesicus furinalis</i>          | 40,2 | F | Adult    | Inactive      | Spleen and Blood    |
| MM 132  |                 | <i>Steatonyssus sp.</i>             |      |   |          |               | Macronyssidae mite  |
| MCG 133 | CEA Florestinha | <i>Artibeus lituratus</i>           | 73,8 | M | Juvenile | Inactive      | Spleen and Blood    |
| SM 133  |                 | <i>Periglischrus iheringi</i>       |      |   |          |               | Spinturnicidae mite |
| MCG 134 | CEA Florestinha | <i>Artibeus lituratus</i>           | 72,6 | M | Adult    | Active        | Spleen and Blood    |

|         |                 |                               |      |   |       |        |                     |
|---------|-----------------|-------------------------------|------|---|-------|--------|---------------------|
| SM 134  |                 | <i>Periglischrus iheringi</i> |      |   |       |        | Spinturnicidae mite |
| MCG 135 | CEA Florestinha | <i>Artibeus lituratus</i>     | 74,3 | M | Adult | Active | Spleen and Blood    |

---

**Table S2.** Bat samples positive for *Anaplasma* spp. according to PCR assays targeting five different molecular markers.

| ID     | Capture site    | Bat or ectoparasite species  | Host species (if applicable) | Sample type | 16S rRNA (cPCR) - Screening | <i>msp-2 A. phagocytophilum</i> (qPCR) | <i>gltA</i> (cPCR) | ITS (cPCR) | <i>groEL</i> (cPCR) |
|--------|-----------------|------------------------------|------------------------------|-------------|-----------------------------|----------------------------------------|--------------------|------------|---------------------|
| MCG 22 | CEA Polonês     | <i>Platyrrhinus lineatus</i> |                              | Spleen      | pos (unique band)           | neg                                    | neg                | neg        | pos                 |
| MCG 59 | CEA Florestinha | <i>Phyllostomus discolor</i> |                              | Blood       | pos (unique band)           | neg                                    | pos + sequenced    | neg        | pos + sequenced     |
| MCG 61 | CEA Florestinha | <i>Phyllostomus discolor</i> |                              | Blood       | pos (unique band)           | neg                                    | neg                | neg        | pos                 |
| MCG 62 | CEA Florestinha | <i>Phyllostomus discolor</i> |                              | Blood       | pos (unique band)           | neg                                    | neg                | neg        | pos                 |
| TL 72  | CEA Florestinha | <i>Ornithodoros hasei</i>    | <i>Phyllostomus discolor</i> | Tick larvae | pos (unique band)           | neg                                    | pos + sequenced    | neg        | pos + sequenced     |
| MCG 88 | CEA Polonês     | <i>Platyrrhinus lineatus</i> |                              | Spleen      | pos (unique band)           | neg                                    | neg                | neg        | pos                 |
| MCG 89 | CEA Polonês     | <i>Platyrrhinus lineatus</i> |                              | Spleen      | pos (unique band)           | neg                                    | neg                | neg        | neg                 |

neg = negative; pos: positive; pos + sequenced: positive and submitted to Sanger sequencing.

**Table S3.** Bat samples positive for *Ehrlichia* spp. according to PCR assays targeting six different molecular markers.

| ID     | Capture site    | Bat or ectoparasite species  | Host specie (if applicable)  | Sample type        | <i>dsb</i> (cPCR) - Screening | <i>dsb E.canis</i> (qPCR) | <i>vlp E. chaffeensis</i> (qPCR) | <i>groEL</i> (cPCR) | <i>sodB</i> (cPCR) | <i>omp-1</i> (cPCR) |
|--------|-----------------|------------------------------|------------------------------|--------------------|-------------------------------|---------------------------|----------------------------------|---------------------|--------------------|---------------------|
| MCG 01 | CEA Polonês     | <i>Artibeus lituratus</i>    |                              | Spleen             | pos                           | neg                       | neg                              | neg                 | neg                | neg                 |
| MCG 03 | CEA Polonês     | <i>Artibeus planirostris</i> |                              | Blood              | pos                           | neg                       | neg                              | neg                 | neg                | neg                 |
| MM 04  | CEA Polonês     | <i>Steatonyssus</i> sp.      | <i>Myotis nigricans</i>      | Macronyssidae mite | pos                           | neg                       | neg                              | neg                 | neg                | neg                 |
| MM 05  | CEA Polonês     | <i>Steatonyssus</i> sp.      | <i>Platyrrhinus lineatus</i> | Macronyssidae mite | pos + sequenced               | neg                       | neg                              | neg                 | neg                | neg                 |
| MCG 07 | CEA Polonês     | <i>Artibeus planirostris</i> |                              | Spleen             | pos                           | neg                       | neg                              | neg                 | neg                | neg                 |
| MCG 07 |                 |                              |                              | Blood              | pos                           | neg                       | neg                              | neg                 | neg                | neg                 |
| BF 10  | CEA Polonês     | <i>Megistopoda aranea</i>    | <i>Artibeus lituratus</i>    | Bat fly 10         | pos                           | neg                       | neg                              | neg                 | neg                | neg                 |
| BF 12  | CEA Polonês     | <i>Megistopoda aranea</i>    | <i>Artibeus planirostris</i> | Bat fly 12         | pos                           | neg                       | neg                              | neg                 | neg                | neg                 |
| MCG 14 | CEA Polonês     | <i>Artibeus planirostris</i> |                              | Blood              | pos                           | neg                       | neg                              | neg                 | neg                | neg                 |
| MM 23  | CEA Polonês     | <i>Steatonyssus</i> sp.      | <i>Eptesicus furinalis</i>   | Macronyssidae mite | pos + sequenced               | neg                       | neg                              | neg                 | neg                | neg                 |
| MCG 25 | CEA Polonês     | <i>Platyrrhinus lineatus</i> |                              | Spleen             | pos                           | neg                       | neg                              | neg                 | neg                | neg                 |
| MCG 29 | CEA Polonês     | <i>Artibeus planirostris</i> |                              | Blood              | pos                           | neg                       | neg                              | neg                 | neg                | neg                 |
| BF 38  | CEA Florestinha | <i>Megistopoda aranea</i>    | <i>Artibeus planirostris</i> | Bat fly            | pos                           | neg                       | neg                              | neg                 | neg                | neg                 |
| MCG 40 | CEA Florestinha | <i>Artibeus planirostris</i> |                              | Spleen             | pos                           | neg                       | neg                              | neg                 | neg                | neg                 |



|         |                 |                                   |                              |                     |                 |     |     |     |     |     |
|---------|-----------------|-----------------------------------|------------------------------|---------------------|-----------------|-----|-----|-----|-----|-----|
| MCG 44  | CEA Polonês     | <i>Artibeus planirostris</i>      |                              | Spleen              | pos             | neg | neg | neg | neg | neg |
| MCG 55  | CEA Florestinha | <i>Phyllostomus discolor</i>      |                              | Blood               | pos             | neg | neg | neg | neg | neg |
| BF 56.5 | CEA Florestinha | <i>Trichobius costalimai</i>      | <i>Phyllostomus discolor</i> | Bat fly             | pos             | neg | neg | neg | neg | neg |
| SM 56.1 |                 | <i>Periglischrus torrealbai</i>   | <i>Phyllostomus discolor</i> | Spinturnicidae mite | pos             | neg | neg | neg | neg | neg |
| SM 56.2 |                 | <i>Periglischrus acutisternus</i> | <i>Phyllostomus discolor</i> | Spinturnicidae mite | pos             | neg | neg | neg | neg | neg |
| MM 56   |                 | <i>Steatonyssus</i> sp.           | <i>Phyllostomus discolor</i> | Macronyssidae mite  | pos + sequenced | neg | neg | neg | neg | neg |
| TL 56.2 |                 | <i>Ornithodoros hasei</i>         | <i>Phyllostomus discolor</i> | Tick larvae         | pos             | neg | neg | neg | neg | neg |
| BF 57.5 | CEA Florestinha | <i>Trichobius costalimai</i>      | <i>Phyllostomus discolor</i> | Bat fly             | pos             | neg | neg | neg | neg | neg |
| MCG 59  | CEA Florestinha | <i>Phyllostomus discolor</i>      |                              | Blood               | pos             | neg | neg | neg | neg | neg |
| MCG 62  | CEA Florestinha | <i>Phyllostomus discolor</i>      |                              | Blood               | pos             | neg | neg | neg | neg | neg |
| SM 62.1 |                 | <i>Periglischrus</i> sp.          | <i>Phyllostomus discolor</i> | Spinturnicidae mite | pos + sequenced | neg | neg | neg | neg | neg |
| SM 62.2 |                 | <i>Periglischrus</i> sp.          | <i>Phyllostomus discolor</i> | Spinturnicidae mite | pos + sequenced | neg | neg | neg | neg | neg |
| MM 63   | CEA Florestinha | <i>Steatonyssus</i> sp.           | <i>Phyllostomus discolor</i> | Macronyssidae mite  | pos + sequenced | neg | neg | neg | neg | neg |
| TL 63.1 |                 | <i>Ornithodoros hasei</i>         | <i>Phyllostomus discolor</i> | Tick larvae         | pos             | neg | neg | neg | neg | neg |
| TL 63.4 |                 | <i>Ornithodoros hasei</i>         | <i>Phyllostomus discolor</i> | Tick larvae         | pos             | neg | neg | neg | neg | neg |
| MM 64   | CEA Florestinha | <i>Steatonyssus</i> sp.           | <i>Phyllostomus discolor</i> | Macronyssidae mite  | pos + sequenced | neg | neg | neg | neg | neg |
| SM 67   | CEA Florestinha | <i>Periglischrus torrealbai</i>   | <i>Phyllostomus discolor</i> | Spinturnicidae mite | pos             | neg | neg | neg | neg | neg |
| MCG 69  | CEA Florestinha | <i>Carollia perspicillata</i>     |                              | Spleen              | pos             | neg | neg | neg | neg | neg |
| BF 70.1 | CEA Florestinha | <i>Strebla hertigi</i>            | <i>Phyllostomus discolor</i> | Bat fly             | pos             | neg | neg | neg | neg | neg |
| BF 70.2 |                 | <i>Strebla hertigi</i>            | <i>Phyllostomus discolor</i> | Bat fly             | pos             | neg | neg | neg | neg | neg |
| SM 70.1 |                 | <i>Periglischrus</i> sp.          | <i>Phyllostomus discolor</i> | Spinturnicidae mite | pos             | neg | neg | neg | neg | neg |
| MCG 71  | CEA Florestinha | <i>Phyllostomus discolor</i>      |                              | Blood               | pos + sequenced | neg | neg | neg | neg | neg |
| MM 71   |                 | <i>Steatonyssus</i> sp.           | <i>Phyllostomus discolor</i> | Macronyssidae mite  | pos + sequenced | neg | neg | neg | neg | neg |
| MM 74   | CEA Polonês     | <i>Steatonyssus</i> sp.           | <i>Eptesicus furinalis</i>   | Macronyssidae mite  | pos + sequenced | neg | neg | neg | neg | neg |
| MM 75   | CEA Polonês     | <i>Steatonyssus</i> sp.           | <i>Eptesicus furinalis</i>   | Macronyssidae mite  | pos + sequenced | neg | neg | neg | neg | neg |
| MM 82   | CEA Polonês     | <i>Steatonyssus</i> sp.           | <i>Eptesicus furinalis</i>   | Macronyssidae mite  | pos + sequenced | neg | neg | neg | neg | neg |
| MM 90   | CEA Polonês     | <i>Steatonyssus</i> sp.           | <i>Artibeus lituratus</i>    | Macronyssidae mite  | pos             | neg | neg | neg | neg | neg |

|         |                 |                              |                              |                    |     |     |     |     |     |     |
|---------|-----------------|------------------------------|------------------------------|--------------------|-----|-----|-----|-----|-----|-----|
| MM 91   | CEA Florestinha | <i>Steatonyssus</i> sp.      | <i>Eumops perotis</i>        | Macronyssidae mite | pos | neg | neg | neg | neg | neg |
| MM 92   | CEA Florestinha | <i>Steatonyssus</i> sp.      | <i>Eumops perotis</i>        | Macronyssidae mite | pos | neg | neg | neg | neg | neg |
| MM 93   | CEA Florestinha | <i>Steatonyssus</i> sp.      | <i>Eumops perotis</i>        | Macronyssidae mite | pos | neg | neg | neg | neg | neg |
| MM 94   | CEA Florestinha | <i>Steatonyssus</i> sp.      | <i>Molossus molossus</i>     | Macronyssidae mite | pos | neg | neg | neg | neg | neg |
| MM 95   | CEA Florestinha | <i>Steatonyssus</i> sp.      | <i>Eumops perotis</i>        | Macronyssidae mite | pos | neg | neg | neg | neg | neg |
| MCG 101 | CEA Polonês     | <i>Platyrrhinus lineatus</i> |                              | Spleen             | pos | neg | neg | neg | neg | neg |
| MCG 102 | CEA Polonês     | <i>Artibeus lituratus</i>    |                              | Spleen             | pos | neg | neg | neg | neg | neg |
| MM 106  | CEA Polonês     | <i>Steatonyssus</i> sp.      | <i>Eptesicus furinalis</i>   | Macronyssidae mite | pos | neg | neg | neg | neg | neg |
| MCG 113 | CEA Polonês     | <i>Artibeus planirostris</i> |                              | Blood              | pos | neg | neg | neg | neg | neg |
| MM 122  | CEA Polonês     | <i>Steatonyssus</i> sp.      | <i>Artibeus planirostris</i> | Macronyssidae mite | pos | neg | neg | neg | neg | neg |
| MM 123  | CEA Polonês     | <i>Steatonyssus</i> sp.      | <i>Eptesicus furinalis</i>   | Macronyssidae mite | pos | neg | neg | neg | neg | neg |
| MCG 124 | CEA Polonês     | <i>Eptesicus furinalis</i>   |                              | Blood              | pos | neg | neg | neg | neg | neg |

neg = negative; pos: positive; pos + sequenced: positive and submitted to Sanger sequencing.

**Table S4.** Bat samples positive for *Neorickettsia* spp. according to PCR assays targeting three different molecular markers.

| ID     | Capture site    | Bat or ectoparasite species  | Host specie (if applicable) | Sample type | 16S rRNA (cPCR) Screening | Additional 16S rRNA (cPCR) | <i>p51kDa</i> (cPCR) | <i>groEL</i> (cPCR) |
|--------|-----------------|------------------------------|-----------------------------|-------------|---------------------------|----------------------------|----------------------|---------------------|
| MCG 01 | CEA Polonês     | <i>Artibeus lituratus</i>    |                             | Spleen      | pos                       | neg                        | neg                  | neg                 |
| MCG 02 | CEA Polonês     | <i>Artibeus lituratus</i>    |                             | Blood       | pos + sequenced           | neg                        | neg                  | neg                 |
| MCG 09 | CEA Polonês     | <i>Glossophaga soricina</i>  |                             | Spleen      | pos                       | neg                        | neg                  | neg                 |
| MCG 09 |                 |                              |                             | Blood       | pos + sequenced           | neg                        | neg                  | neg                 |
| MCG 15 | CEA Polonês     | <i>Platyrrhinus lineatus</i> |                             | Spleen      | pos                       | neg                        | neg                  | neg                 |
| MCG 16 | CEA Polonês     | <i>Artibeus planirostris</i> |                             | Spleen      | pos                       | neg                        | neg                  | neg                 |
| MCG 20 | CEA Polonês     | <i>Platyrrhinus lineatus</i> |                             | Blood       | pos                       | neg                        | neg                  | neg                 |
| MCG 21 | CEA Polonês     | <i>Platyrrhinus lineatus</i> |                             | Blood       | pos                       | neg                        | neg                  | neg                 |
| MCG 22 | CEA Polonês     | <i>Platyrrhinus lineatus</i> |                             | Spleen      | pos                       | neg                        | neg                  | neg                 |
| MCG 26 | CEA Polonês     | <i>Artibeus planirostris</i> |                             | Spleen      | pos                       | neg                        | neg                  | neg                 |
| MCG 30 | CEA Polonês     | <i>Platyrrhinus lineatus</i> |                             | Blood       | pos                       | neg                        | neg                  | neg                 |
| MCG 32 | CEA Polonês     | <i>Platyrrhinus lineatus</i> |                             | Blood       | pos                       | neg                        | neg                  | neg                 |
| MCG 34 | CEA Polonês     | <i>Platyrrhinus lineatus</i> |                             | Spleen      | pos                       | neg                        | neg                  | neg                 |
| MCG 35 | CEA Polonês     | <i>Artibeus planirostris</i> |                             | Blood       | pos                       | neg                        | neg                  | neg                 |
| MCG 39 | CEA Florestinha | <i>Artibeus planirostris</i> |                             | Blood       | pos + sequenced           | neg                        | neg                  | neg                 |
| MCG 40 | CEA Florestinha | <i>Artibeus planirostris</i> |                             | Spleen      | pos                       | neg                        | neg                  | neg                 |
| MCG 43 | CEA Florestinha | <i>Artibeus planirostris</i> |                             | Blood       | pos                       | neg                        | neg                  | neg                 |
| MCG 44 | CEA Polonês     | <i>Artibeus planirostris</i> |                             | Spleen      | pos                       | neg                        | neg                  | neg                 |
| MCG 45 | CEA Polonês     | <i>Myotis nigricans</i>      |                             | Blood       | pos                       | neg                        | neg                  | neg                 |
| MCG 46 | CEA Polonês     | <i>Artibeus lituratus</i>    |                             | Spleen      | pos                       | neg                        | neg                  | neg                 |
| MCG 51 | CEA Polonês     | <i>Artibeus planirostris</i> |                             | Spleen      | pos + sequenced           | neg                        | neg                  | neg                 |
| MCG 52 | CEA Polonês     | <i>Molossus molossus</i>     |                             | Spleen      | pos                       | neg                        | neg                  | neg                 |
| MCG 53 | CEA Polonês     | <i>Artibeus lituratus</i>    |                             | Blood       | pos                       | neg                        | neg                  | neg                 |
| MCG 54 | CEA Florestinha | <i>Molossus molossus</i>     |                             | Blood       | pos + sequenced           | neg                        | neg                  | neg                 |
| MCG 55 | CEA Florestinha | <i>Phyllostomus discolor</i> |                             | Blood       | pos                       | neg                        | neg                  | neg                 |
| MCG 57 | CEA Florestinha | <i>Phyllostomus discolor</i> |                             | Spleen      | pos                       | neg                        | neg                  | neg                 |
| MCG 57 |                 |                              |                             | Blood       | pos                       | neg                        | neg                  | neg                 |

|         |                 |                                                        |             |                 |     |     |     |
|---------|-----------------|--------------------------------------------------------|-------------|-----------------|-----|-----|-----|
| MCG 58  | CEA Florestinha | <i>Artibeus lituratus</i>                              | Spleen      | pos             | neg | neg | neg |
| MCG 58  |                 |                                                        | Blood       | pos             | neg | neg | neg |
| MCG 59  | CEA Florestinha | <i>Phyllostomus discolor</i>                           | Blood       | pos             | neg | neg | neg |
| MCG 60  | CEA Florestinha | <i>Molossops temminckii</i>                            | Blood       | pos + sequenced | neg | neg | neg |
| MCG 61  | CEA Florestinha | <i>Phyllostomus discolor</i>                           | Blood       | pos             | neg | neg | neg |
| TL 62   | CEA Florestinha | <i>Ornithodoros hasei</i> <i>Phyllostomus discolor</i> | Tick larvae | pos + sequenced | neg | neg | neg |
| MCG 66  | CEA Florestinha | <i>Phyllostomus discolor</i>                           | Blood       | pos + sequenced | neg | neg | neg |
| MCG 68  | CEA Florestinha | <i>Phyllostomus discolor</i>                           | Blood       | pos             | neg | neg | neg |
| MCG 69  | CEA Florestinha | <i>Carollia perspicillata</i>                          | Spleen      | pos             | neg | neg | neg |
| MCG 69  |                 |                                                        | Blood       | pos + sequenced | neg | neg | neg |
| MCG 70  | CEA Florestinha | <i>Phyllostomus discolor</i>                           | Spleen      | pos             | neg | neg | neg |
| MCG 71  | CEA Florestinha | <i>Phyllostomus discolor</i>                           | Blood       | pos             | neg | neg | neg |
| MCG 74  | CEA Polonês     | <i>Eptesicus cf. furinalis</i>                         | Blood       | pos             | neg | neg | neg |
| MCG 75  | CEA Polonês     | <i>Eptesicus cf. furinalis</i>                         | Blood       | pos + sequenced | neg | neg | neg |
| MCG 79  | CEA Polonês     | <i>Platyrrhinus lineatus</i>                           | Spleen      | pos             | neg | neg | neg |
| MCG 82  | CEA Polonês     | <i>Eptesicus cf. furinalis</i>                         | Blood       | pos             | neg | neg | neg |
| MCG 83  | CEA Polonês     | <i>Platyrrhinus lineatus</i>                           | Blood       | pos + sequenced | neg | neg | neg |
| MCG 84  | CEA Polonês     | <i>Artibeus lituratus</i>                              | Blood       | pos             | neg | neg | neg |
| MCG 88  | CEA Polonês     | <i>Platyrrhinus lineatus</i>                           | Blood       | pos             | neg | neg | neg |
| MCG 89  | CEA Polonês     | <i>Platyrrhinus lineatus</i>                           | Blood       | pos             | neg | neg | neg |
| MCG 90  | CEA Polonês     | <i>Artibeus lituratus</i>                              | Blood       | pos             | neg | neg | neg |
| MCG 92  | CEA Florestinha | <i>Eumops perotis</i>                                  | Blood       | pos + sequenced | neg | neg | neg |
| MCG 96  | CEA Polonês     | <i>Artibeus lituratus</i>                              | Blood       | pos             | neg | neg | neg |
| MCG 99  | CEA Polonês     | <i>Chiroderma villosus</i>                             | Blood       | pos + sequenced | neg | neg | neg |
| MCG 100 | CEA Polonês     | <i>Artibeus lituratus</i>                              | Spleen      | pos             | neg | neg | neg |
| MCG 103 | CEA Polonês     | <i>Artibeus planirostris</i>                           | Blood       | pos             | neg | neg | neg |
| MCG 108 | CEA Polonês     | <i>Artibeus planirostris</i>                           | Spleen      | pos             | neg | neg | neg |
| MCG 111 | CEA Polonês     | <i>Carollia perspicillata</i>                          | Spleen      | pos             | neg | neg | neg |
| MCG 123 | CEA Polonês     | <i>Eptesicus cf. furinalis</i>                         | Spleen      | pos             | neg | neg | neg |
| MCG 129 | CEA Florestinha | <i>Artibeus lituratus</i>                              | Spleen      | pos             | neg | neg | neg |

neg = negative; pos: positive; pos + sequenced: positive and submitted to Sanger sequencing.

**Table S5.** BLASTn results obtained after sequencing of amplicons obtained from PCR assays for *Ehrlichia* spp., *Anaplasma* spp. and *Neorickettsia* spp.

| ID      | Capture site    | Bat or ectoparasite species  | Host Specie (if applicable)  | Sample type         | Targeted gene                         | BLASTn result                               | Query coverage (%) | Identity (%) | Accession Number |
|---------|-----------------|------------------------------|------------------------------|---------------------|---------------------------------------|---------------------------------------------|--------------------|--------------|------------------|
| TL 72   | CEA Florestinha | <i>Ornithodoros hasei</i>    | <i>Phyllostomus discolor</i> | Tick larvae         | 16S rRNA ( <i>Anaplasma</i> spp.)     | <i>Anaplasma phagocytophilum</i>            | 100                | 97.6         | KR611598.1       |
| MCG 59  | CEA Florestinha | <i>Phyllostomus discolor</i> |                              | Blood               | <i>gltA</i> ( <i>Anaplasma</i> spp.)  | <i>Ehrlichia</i> spp.                       | 100                | 83.15        | KJ410275.1       |
| TL 72   | CEA Florestinha | <i>Ornithodoros hasei</i>    | <i>Phyllostomus discolor</i> | Tick larvae         | <i>gltA</i> ( <i>Anaplasma</i> spp.)  | none                                        | -                  | -            | -                |
| MCG 59  | CEA Florestinha | <i>Phyllostomus discolor</i> |                              | Blood               | <i>groEL</i> ( <i>Anaplasma</i> spp.) | none                                        | -                  | -            | -                |
| TL 72   | CEA Florestinha | <i>Ornithodoros hasei</i>    | <i>Phyllostomus discolor</i> | Tick larvae         | <i>groEL</i> ( <i>Anaplasma</i> spp.) | none                                        | -                  | -            | -                |
| MM 05   | CEA Polonês     | <i>Steatonyssus</i> sp.      | <i>Platyrrhinus lineatus</i> | Macronyssidae mite  | <i>dsb</i> ( <i>Ehrlichia</i> spp.)   | <i>Ehrlichia minasensis</i>                 | 99                 | 97.74        | MT212414.1       |
| MM 23   | CEA Polonês     | <i>Steatonyssus</i> sp.      | <i>Eptesicus furinalis</i>   | Macronyssidae mite  | <i>dsb</i> ( <i>Ehrlichia</i> spp.)   | <i>Ehrlichia minasensis</i>                 | 99                 | 99.03        | MT212414.2       |
| MM 56   |                 | <i>Steatonyssus</i> sp.      | <i>Phyllostomus discolor</i> | Macronyssidae mite  | <i>dsb</i> ( <i>Ehrlichia</i> spp.)   | <i>Ehrlichia minasensis</i>                 | 99                 | 98.3         | MT212414.3       |
| SM 62.1 |                 | <i>Periglischrus</i> sp.     | <i>Phyllostomus discolor</i> | Spinturnicidae mite | <i>dsb</i> ( <i>Ehrlichia</i> spp.)   | <i>Ehrlichia minasensis</i>                 | 99                 | 98.75        | MT212414.4       |
| SM 62.2 |                 | <i>Periglischrus</i> sp.     | <i>Phyllostomus discolor</i> | Spinturnicidae mite | <i>dsb</i> ( <i>Ehrlichia</i> spp.)   | <i>Ehrlichia minasensis</i>                 | 99                 | 98.54        | MT212414.5       |
| MM 63   | CEA Florestinha | <i>Steatonyssus</i> sp.      | <i>Phyllostomus discolor</i> | Macronyssidae mite  | <i>dsb</i> ( <i>Ehrlichia</i> spp.)   | <i>Ehrlichia minasensis</i>                 | 99                 | 97.35        | MT212414.6       |
| MM 64   | CEA Florestinha | <i>Steatonyssus</i> sp.      | <i>Phyllostomus discolor</i> | Macronyssidae mite  | <i>dsb</i> ( <i>Ehrlichia</i> spp.)   | <i>Ehrlichia minasensis</i>                 | 99                 | 99.02        | MT212414.7       |
| MCG 71  | CEA Florestinha | <i>Phyllostomus discolor</i> |                              | Blood               | <i>dsb</i> ( <i>Ehrlichia</i> spp.)   | <i>Ehrlichia minasensis</i>                 | 100                | 99.26        | MT212414.8       |
| MM 71   |                 | <i>Steatonyssus</i> sp.      | <i>Phyllostomus discolor</i> | Macronyssidae mite  | <i>dsb</i> ( <i>Ehrlichia</i> spp.)   | <i>Ehrlichia minasensis</i>                 | 99                 | 96.73        | MT212414.9       |
| MM 74   | CEA Polonês     | <i>Steatonyssus</i> sp.      | <i>Eptesicus furinalis</i>   | Macronyssidae mite  | <i>dsb</i> ( <i>Ehrlichia</i> spp.)   | <i>Ehrlichia minasensis</i>                 | 99                 | 98.29        | MT212414.10      |
| MM 75   | CEA Polonês     | <i>Steatonyssus</i> sp.      | <i>Eptesicus furinalis</i>   | Macronyssidae mite  | <i>dsb</i> ( <i>Ehrlichia</i> spp.)   | Uncultured <i>Ehrlichia</i> sp.             | 100                | 100          | MT135771.1       |
| MM 82   | CEA Polonês     | <i>Steatonyssus</i> sp.      | <i>Eptesicus furinalis</i>   | Macronyssidae mite  | <i>dsb</i> ( <i>Ehrlichia</i> spp.)   | <i>Ehrlichia minasensis</i>                 | 100                | 97.76        | MT212414.10      |
| MCG 02  | CEA Polonês     | <i>Artibeus lituratus</i>    |                              | Blood               | 16S rRNA ( <i>Neorickettsia</i> spp.) | <i>Neorickettsia risticii</i> isolate       | 100                | 100          | MK760560.1       |
| MCG 09  | CEA Polonês     | <i>Glossophaga soricina</i>  |                              | Blood               | 16S rRNA ( <i>Neorickettsia</i> spp.) | <i>Neorickettsia risticii</i> str. Illinois | 100                | 99.42        | CP001431.1       |
| MCG 39  | CEA Florestinha | <i>Artibeus planirostris</i> |                              | Blood               | 16S rRNA ( <i>Neorickettsia</i> spp.) | <i>Neorickettsia risticii</i>               | 100                | 99.77        | MK760560.1       |
| MCG 51  | CEA Polonês     | <i>Artibeus planirostris</i> |                              | Spleen              | 16S rRNA ( <i>Neorickettsia</i> spp.) | <i>Neorickettsia risticii</i>               | 100                | 98.57        | MK760560.1       |
| MCG 54  | CEA Florestinha | <i>Molossus molossus</i>     |                              | Blood               | 16S rRNA ( <i>Neorickettsia</i> spp.) | <i>Neorickettsia</i> sp. strain Ohio        | 100                | 100          | MK281366.1       |
| MCG 60  | CEA Florestinha | <i>Molossops temminckii</i>  |                              | Spleen              | 16S rRNA ( <i>Neorickettsia</i> spp.) | <i>Neorickettsia risticii</i> str. Illinois | 100                | 100          | CP001431.1       |
| TL 62.2 | CEA Florestinha | <i>Ornithodoros hasei</i>    | <i>Phyllostomus discolor</i> | Tick larvae         | 16S rRNA ( <i>Neorickettsia</i> spp.) | <i>Neorickettsia risticii</i>               | 100                | 95.07        | MK760560.1       |

|        |                 |                               |       |                                       |                                             |     |       |            |
|--------|-----------------|-------------------------------|-------|---------------------------------------|---------------------------------------------|-----|-------|------------|
| MCG 66 | CEA Florestinha | <i>Phyllostomus discolor</i>  | Blood | 16S rRNA ( <i>Neorickettsia</i> spp.) | <i>Neorickettsia risticii</i> str. Illinois | 100 | 100   | CP001431.1 |
| MCG 69 | CEA Florestinha | <i>Carollia perspicillata</i> | Blood | 16S rRNA ( <i>Neorickettsia</i> spp.) | <i>Neorickettsia</i> sp. strain Ohio        | 100 | 96.7  | MK281366.1 |
| MCG 75 | CEA Polonês     | <i>Eptesicus furinalis</i>    | Blood | 16S rRNA ( <i>Neorickettsia</i> spp.) | <i>Neorickettsia risticii</i> str. Illinois | 100 | 97.9  | CP001431.1 |
| MCG 83 | CEA Polonês     | <i>Platyrrhinus lineatus</i>  | Blood | 16S rRNA ( <i>Neorickettsia</i> spp.) | <i>Neorickettsia risticii</i> str. Illinois | 100 | 100   | CP001431.1 |
| MCG 92 | CEA Florestinha | <i>Eumops perotis</i>         | Blood | 16S rRNA ( <i>Neorickettsia</i> spp.) | <i>Neorickettsia</i> sp. strain Ohio        | 100 | 100   | MK281366.1 |
| MCG 99 | CEA Polonês     | <i>Chiroderma villosus</i>    | Blood | 16S rRNA ( <i>Neorickettsia</i> spp.) | <i>Neorickettsia risticii</i> str. Illinois | 100 | 99.42 | CP001431.1 |
